# Supplementary material
Source: PubMed Central journal article supplement (PMC4344135)

Figure S1- MacPherson et al.

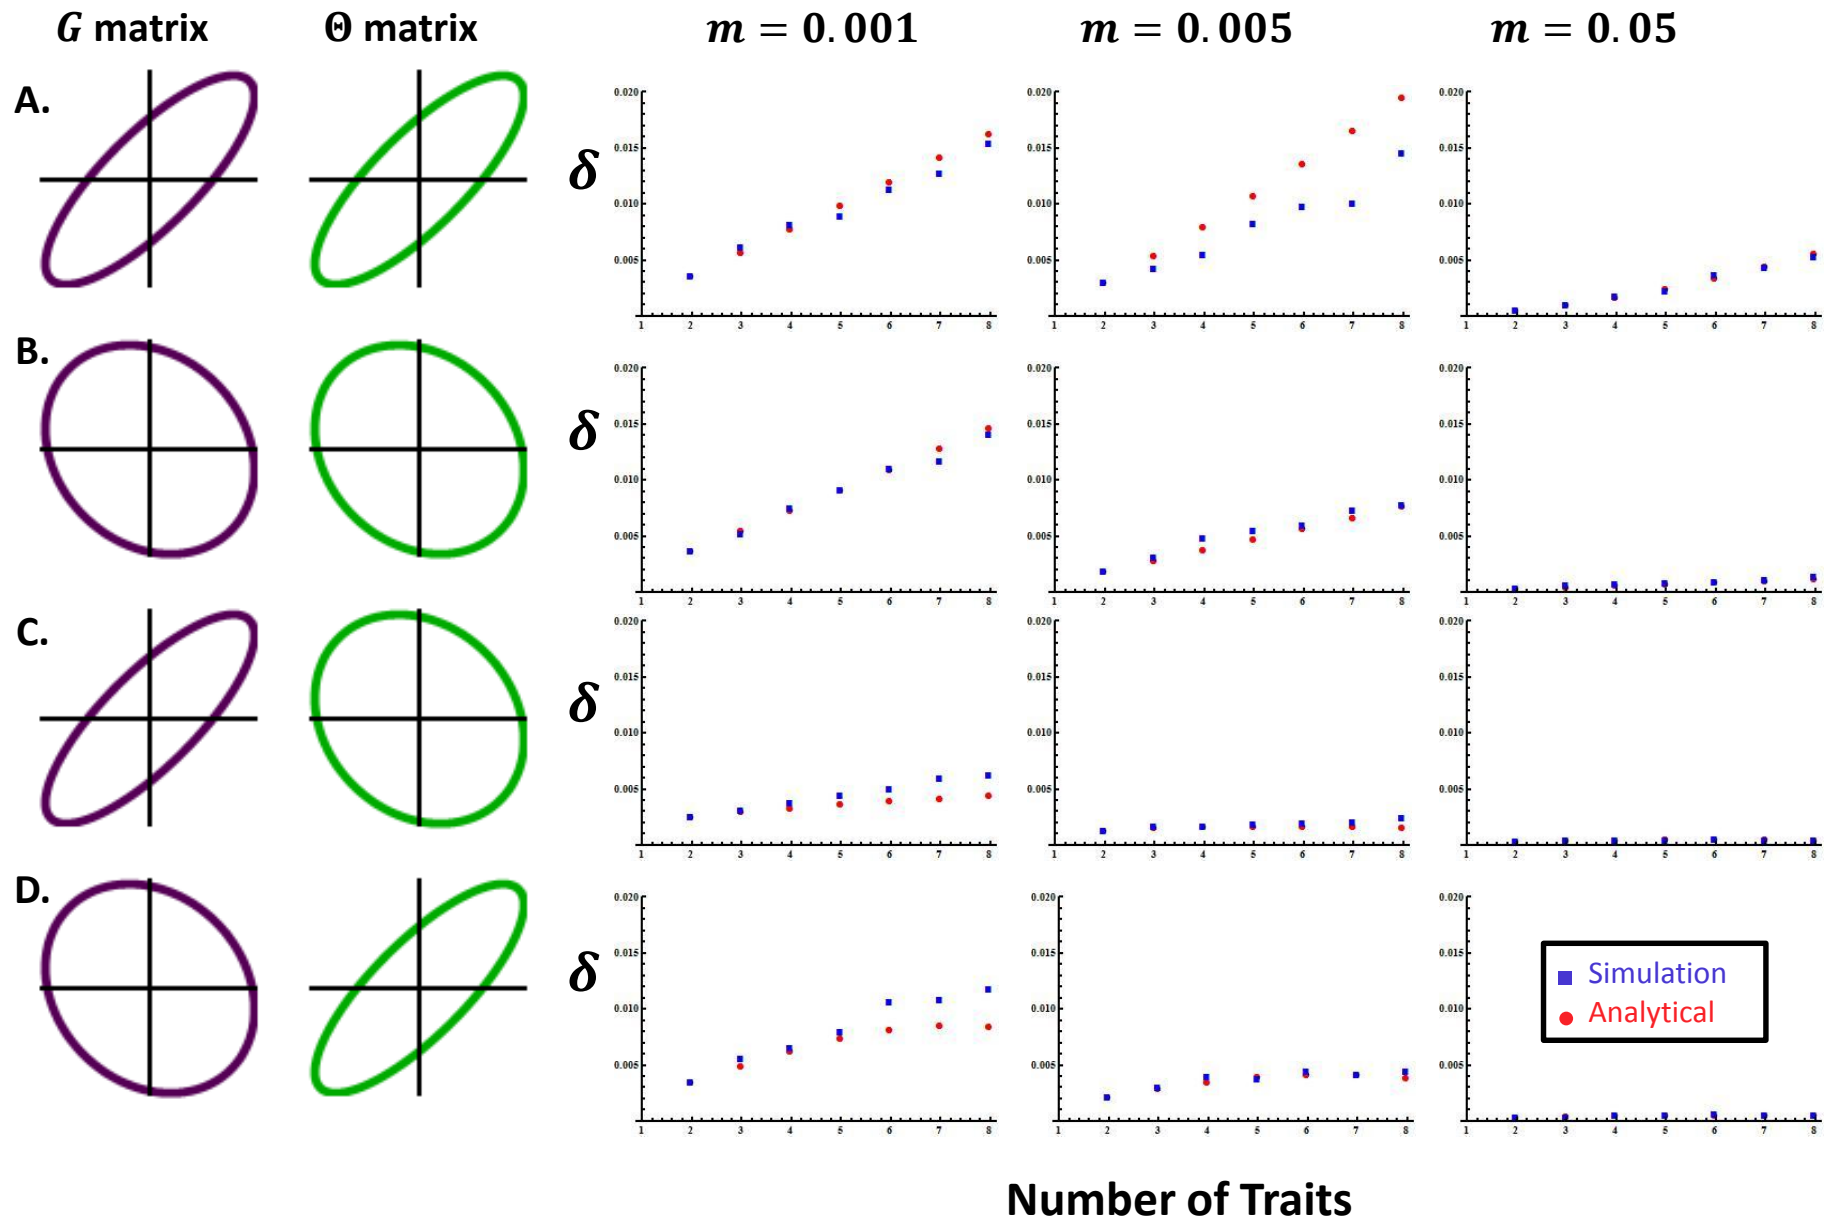

# Figure S2- MacPherson et al.

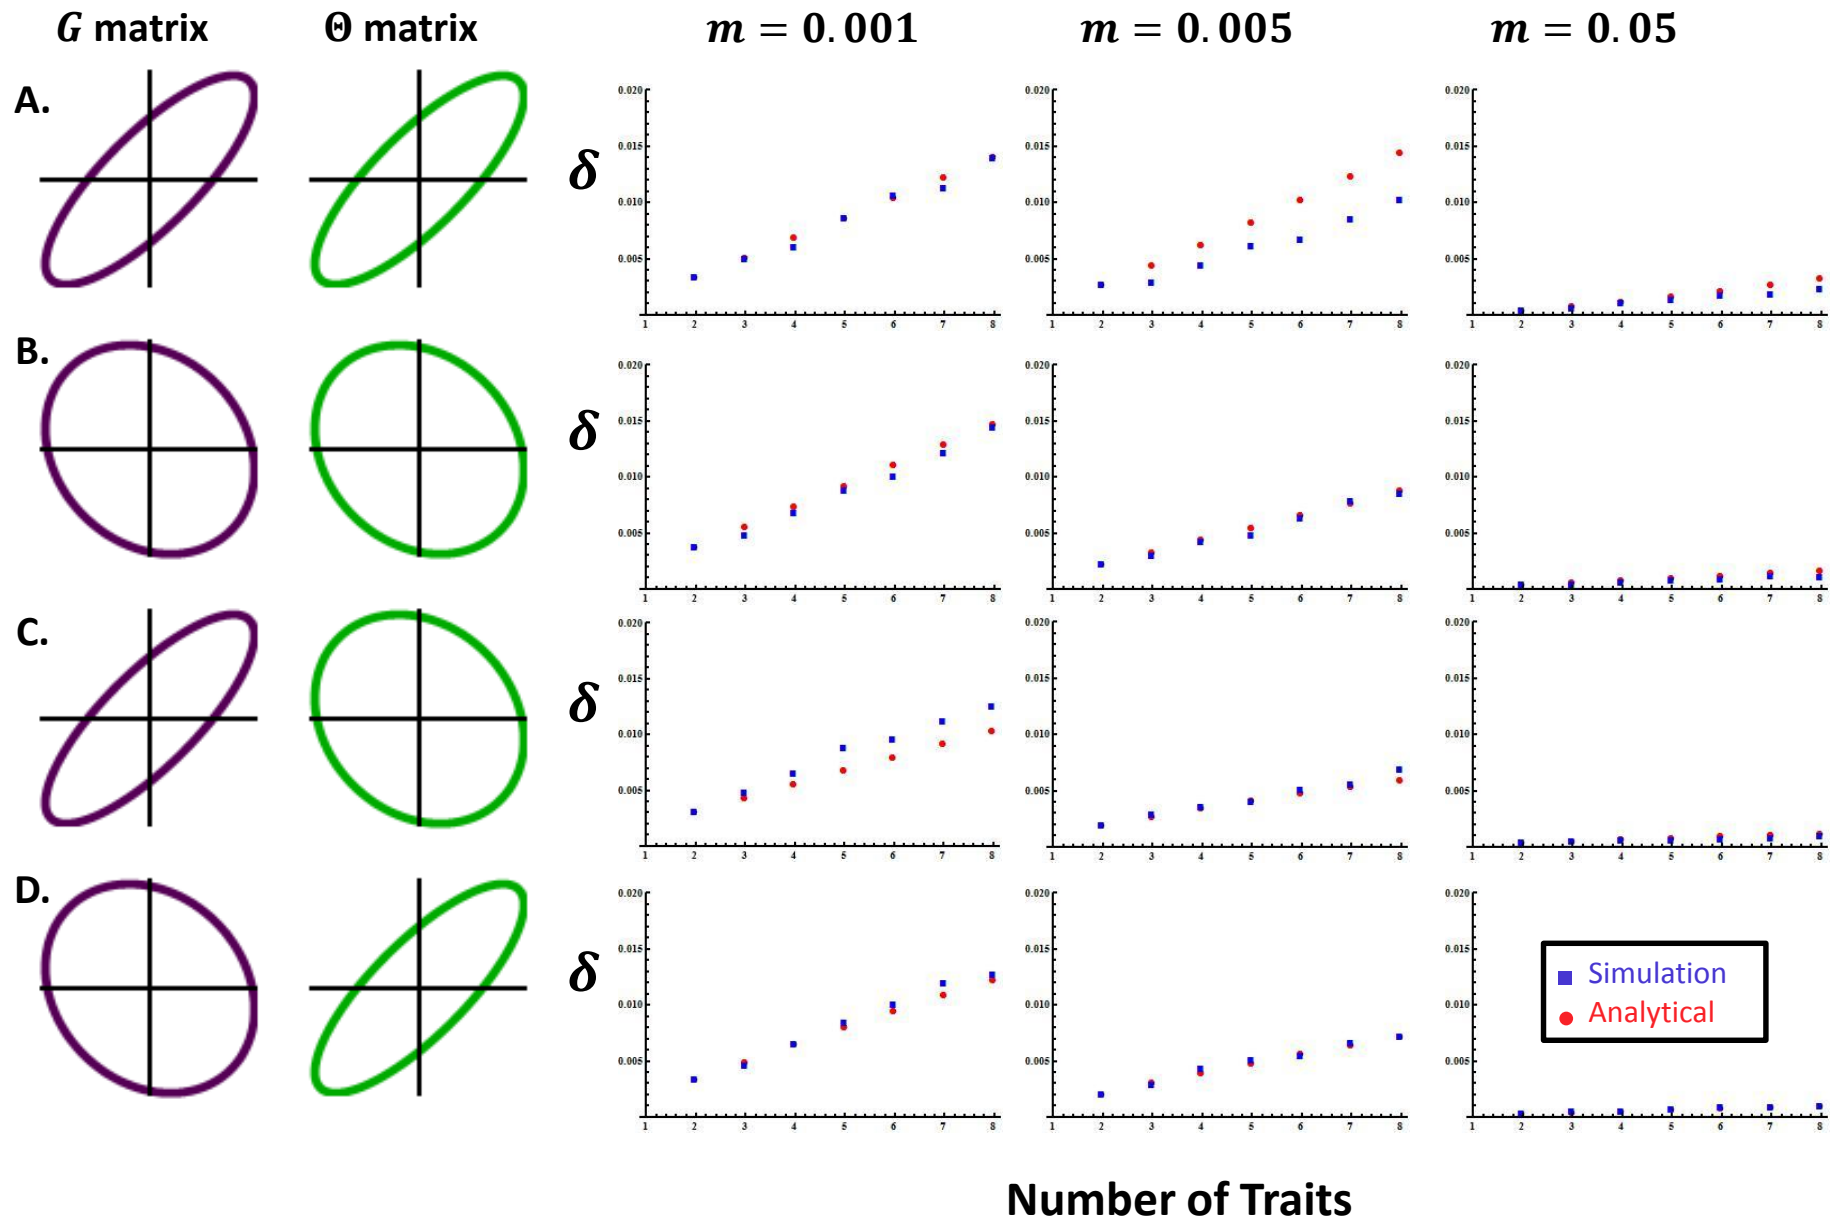

Figure S3- MacPherson et al.

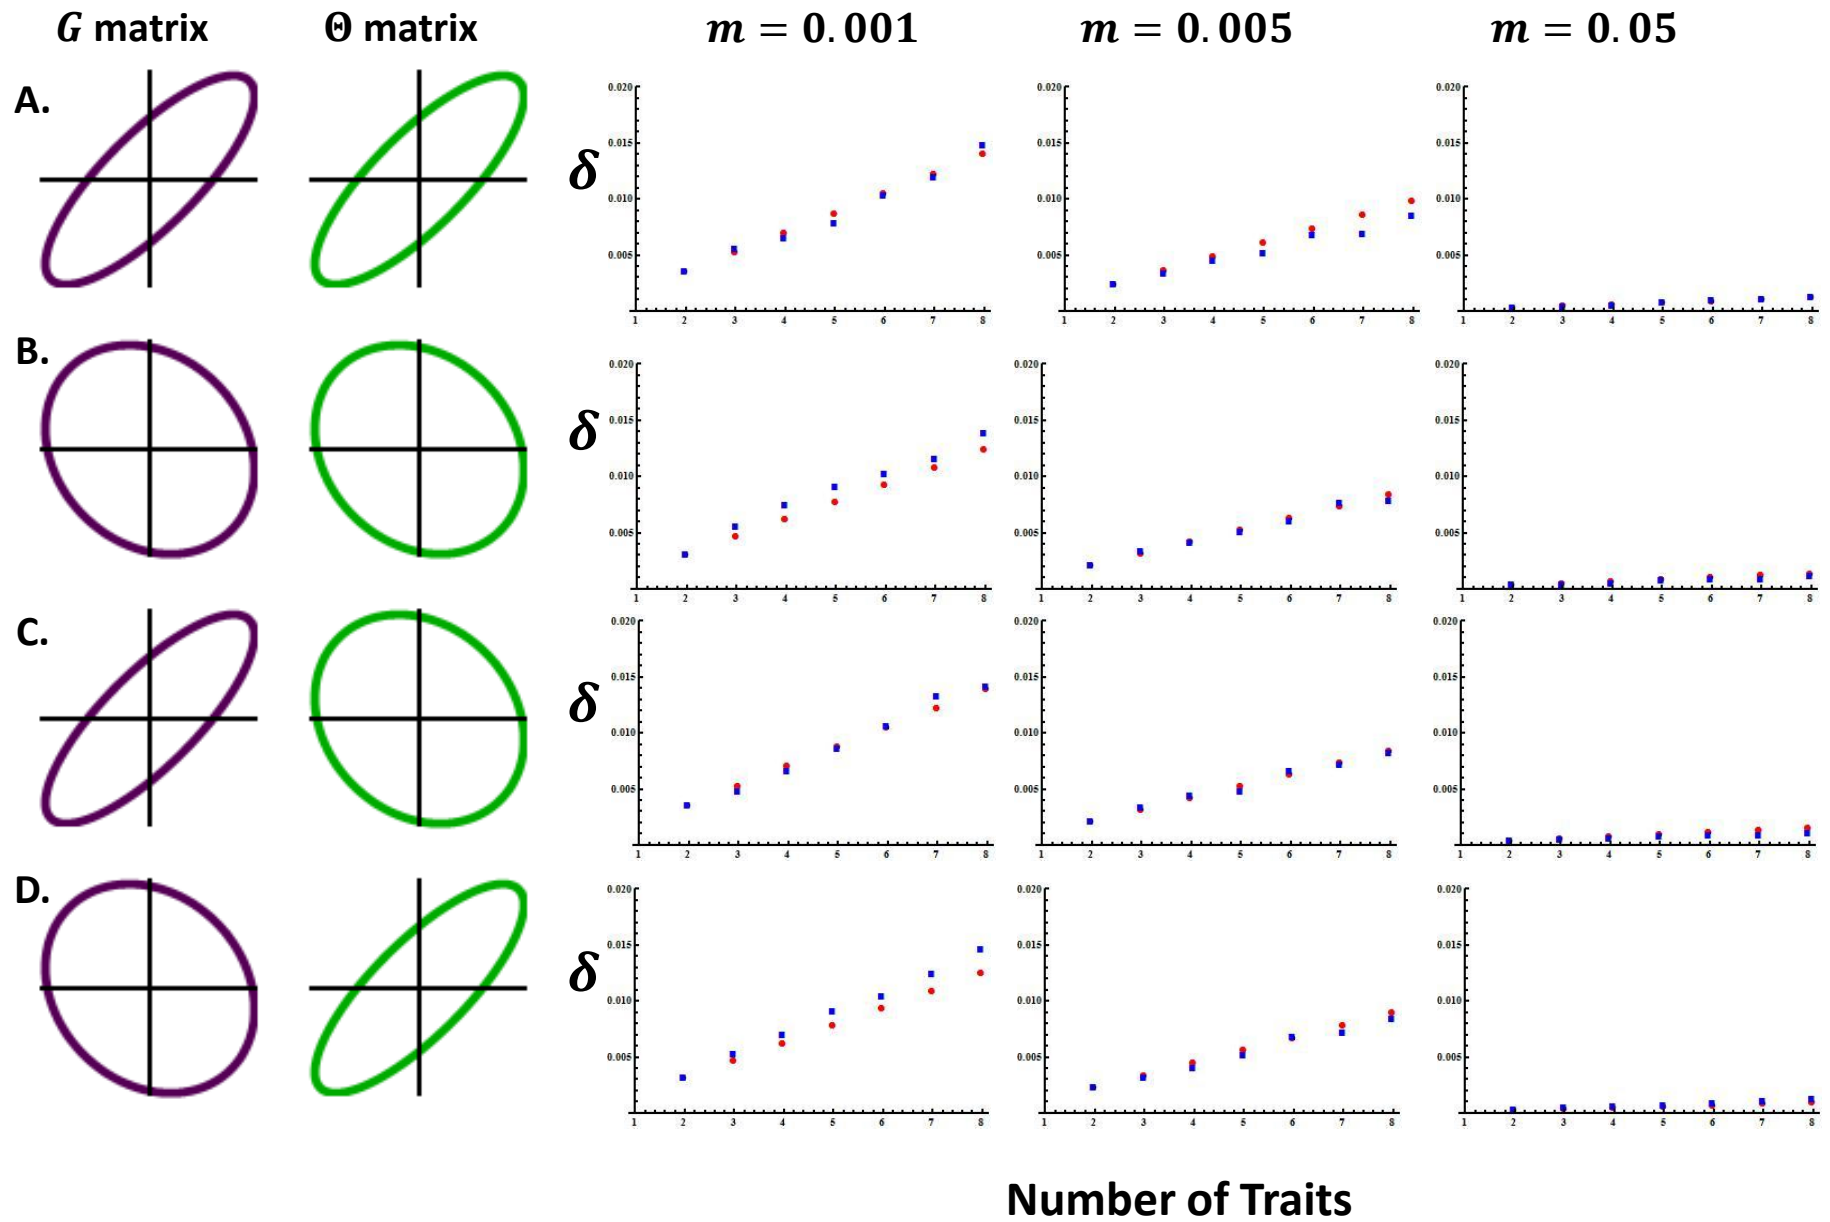

Figure S4- MacPherson et al.

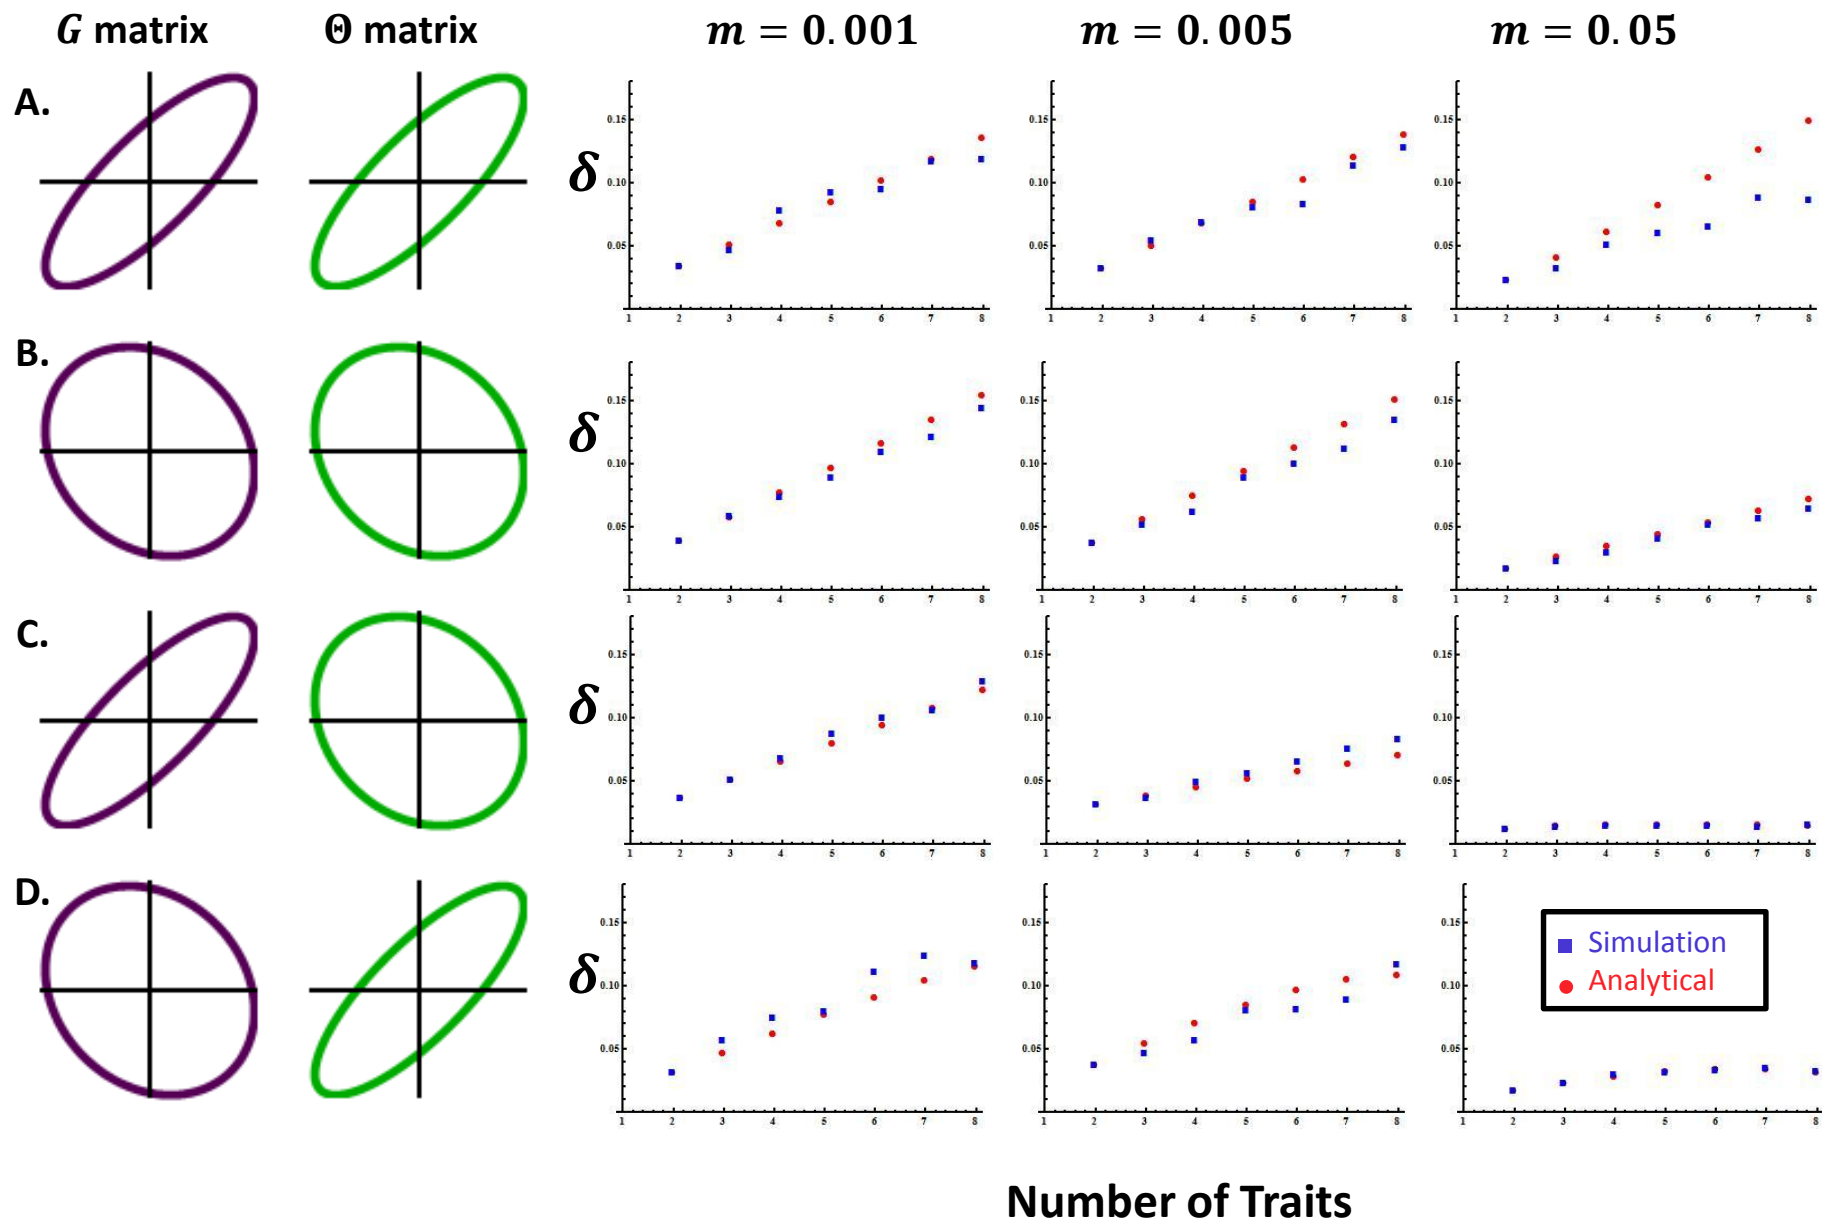

# Figure S5- MacPherson et al.

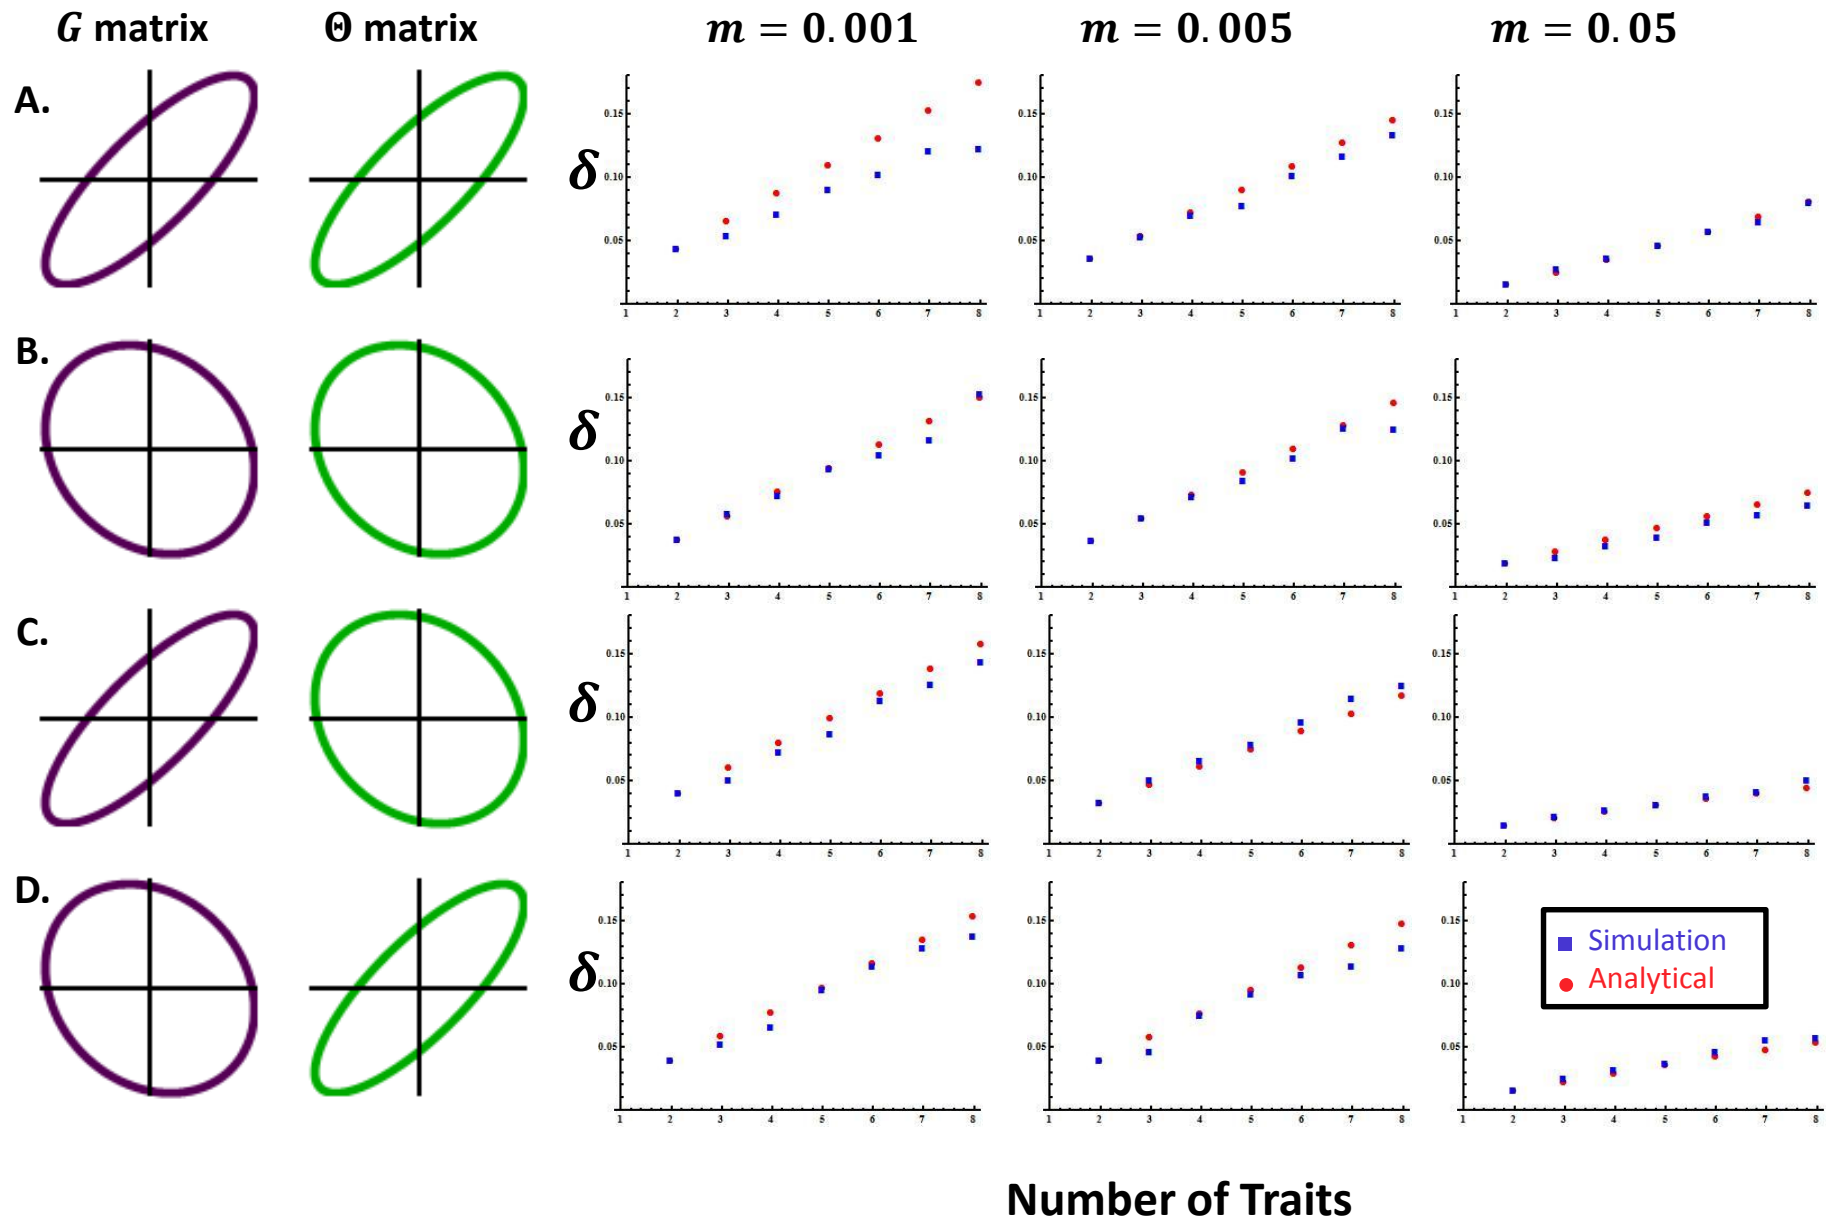

Figure S6- MacPherson et al.

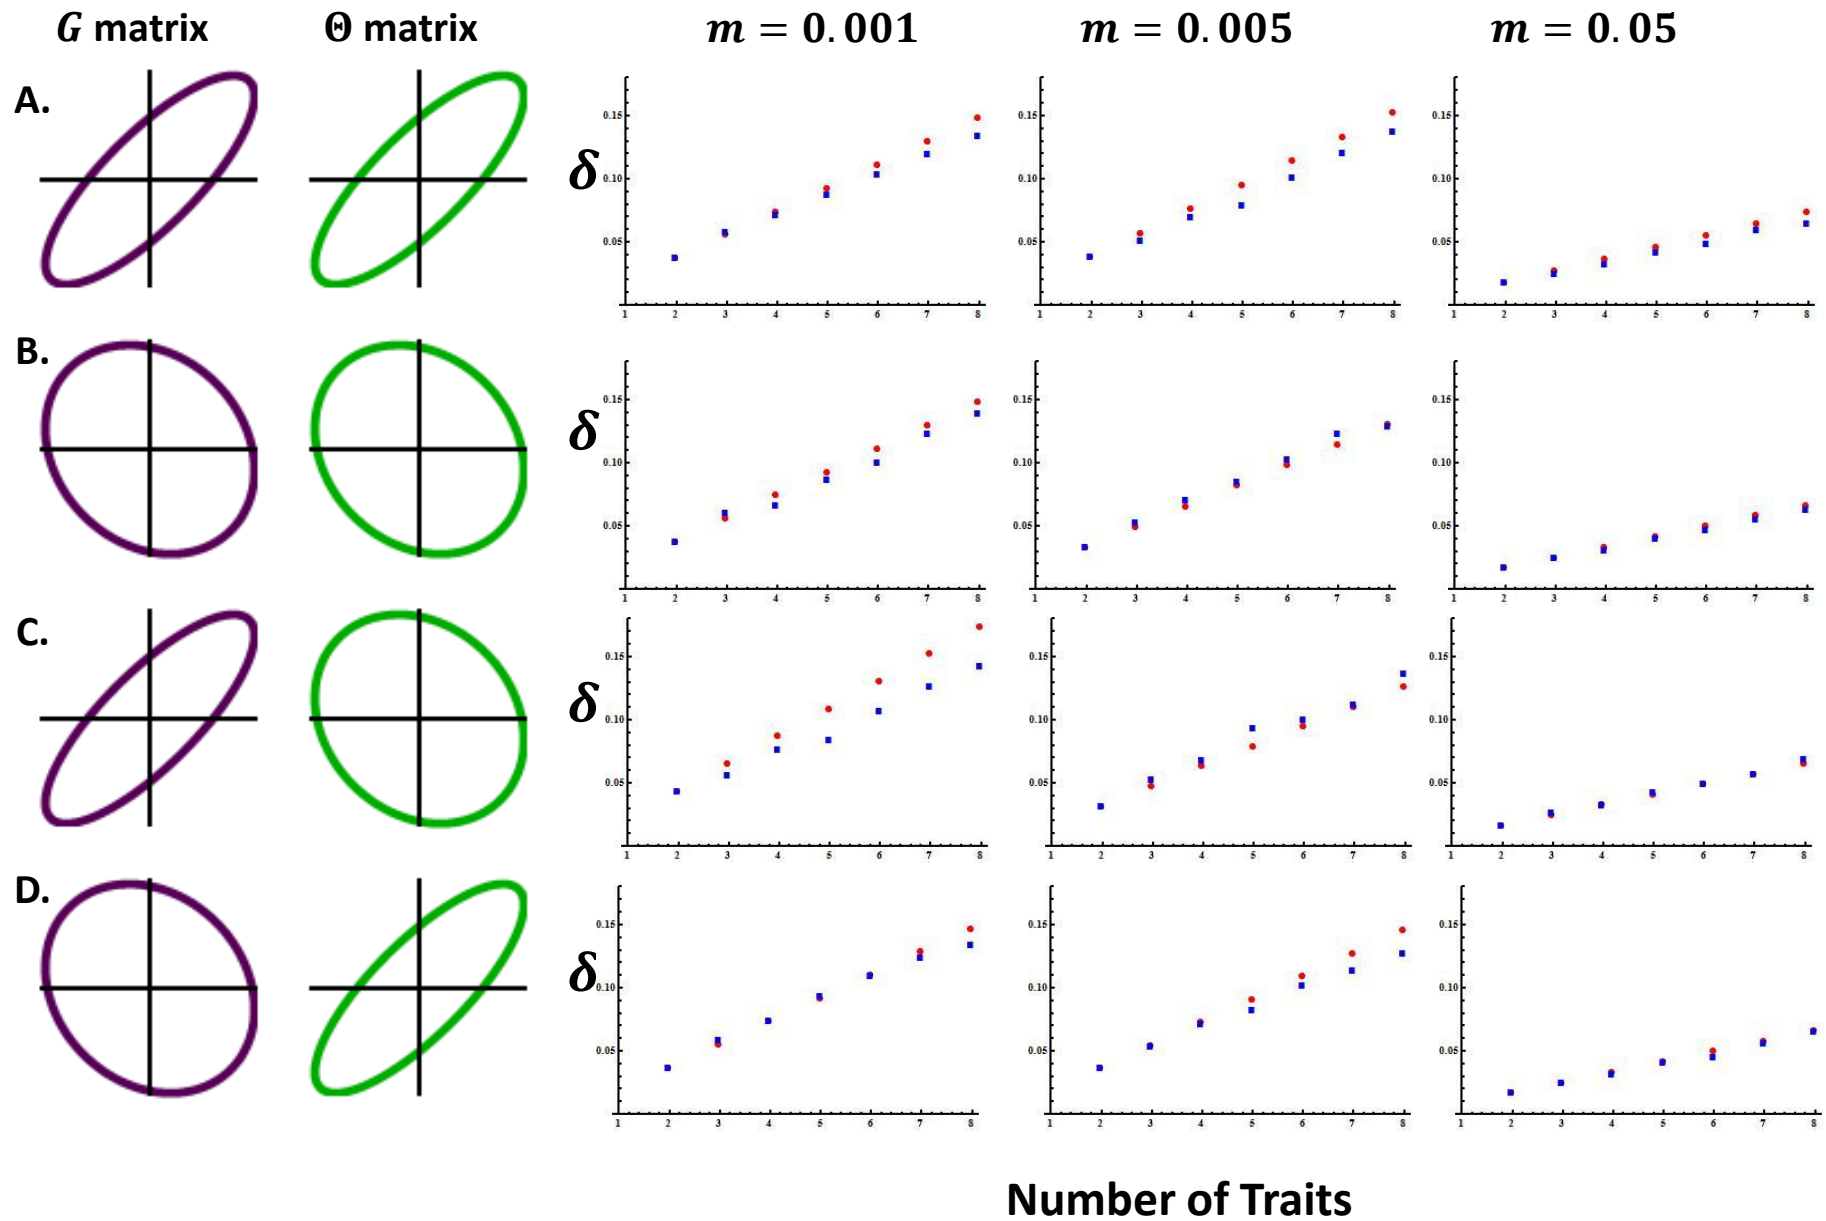

Figure S7- MacPherson et al.

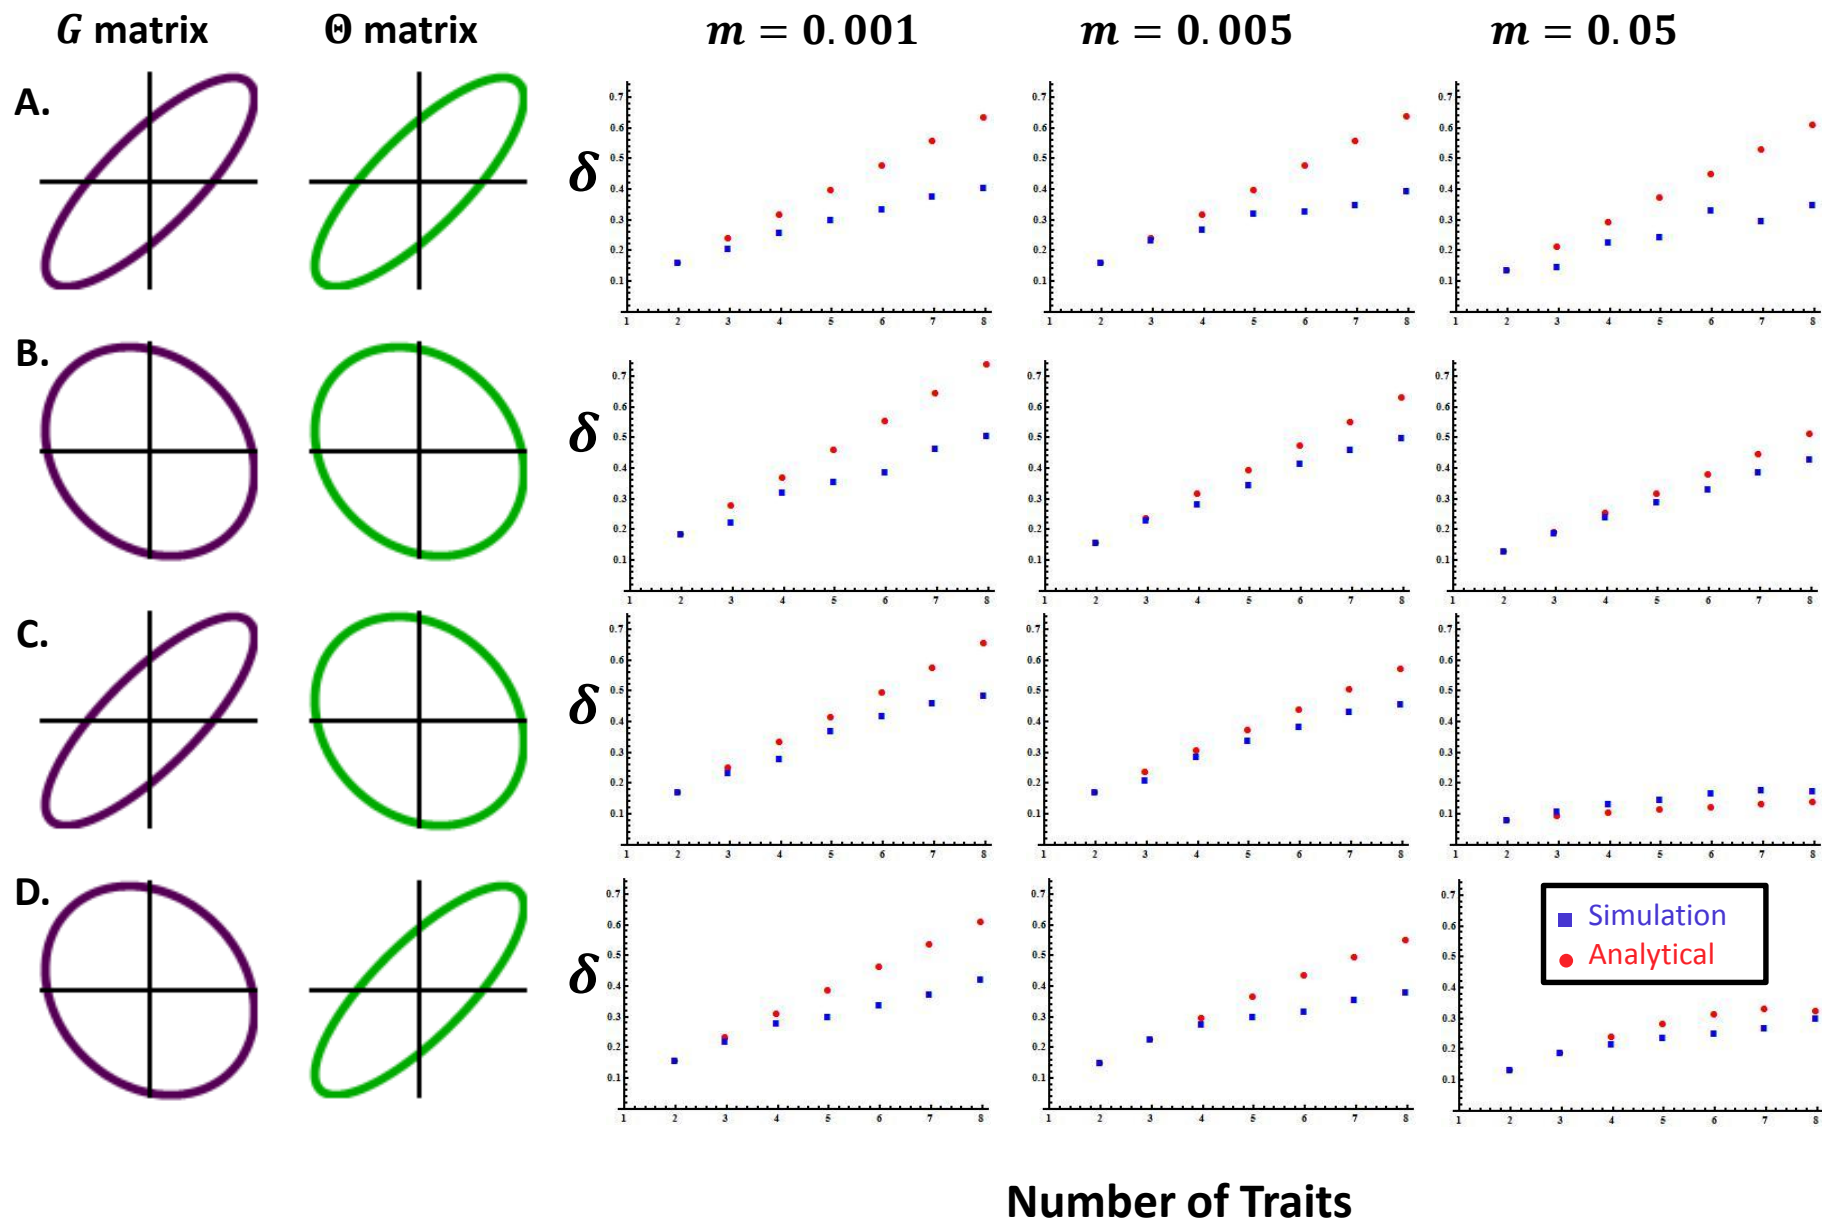

Figure S8- MacPherson et al.

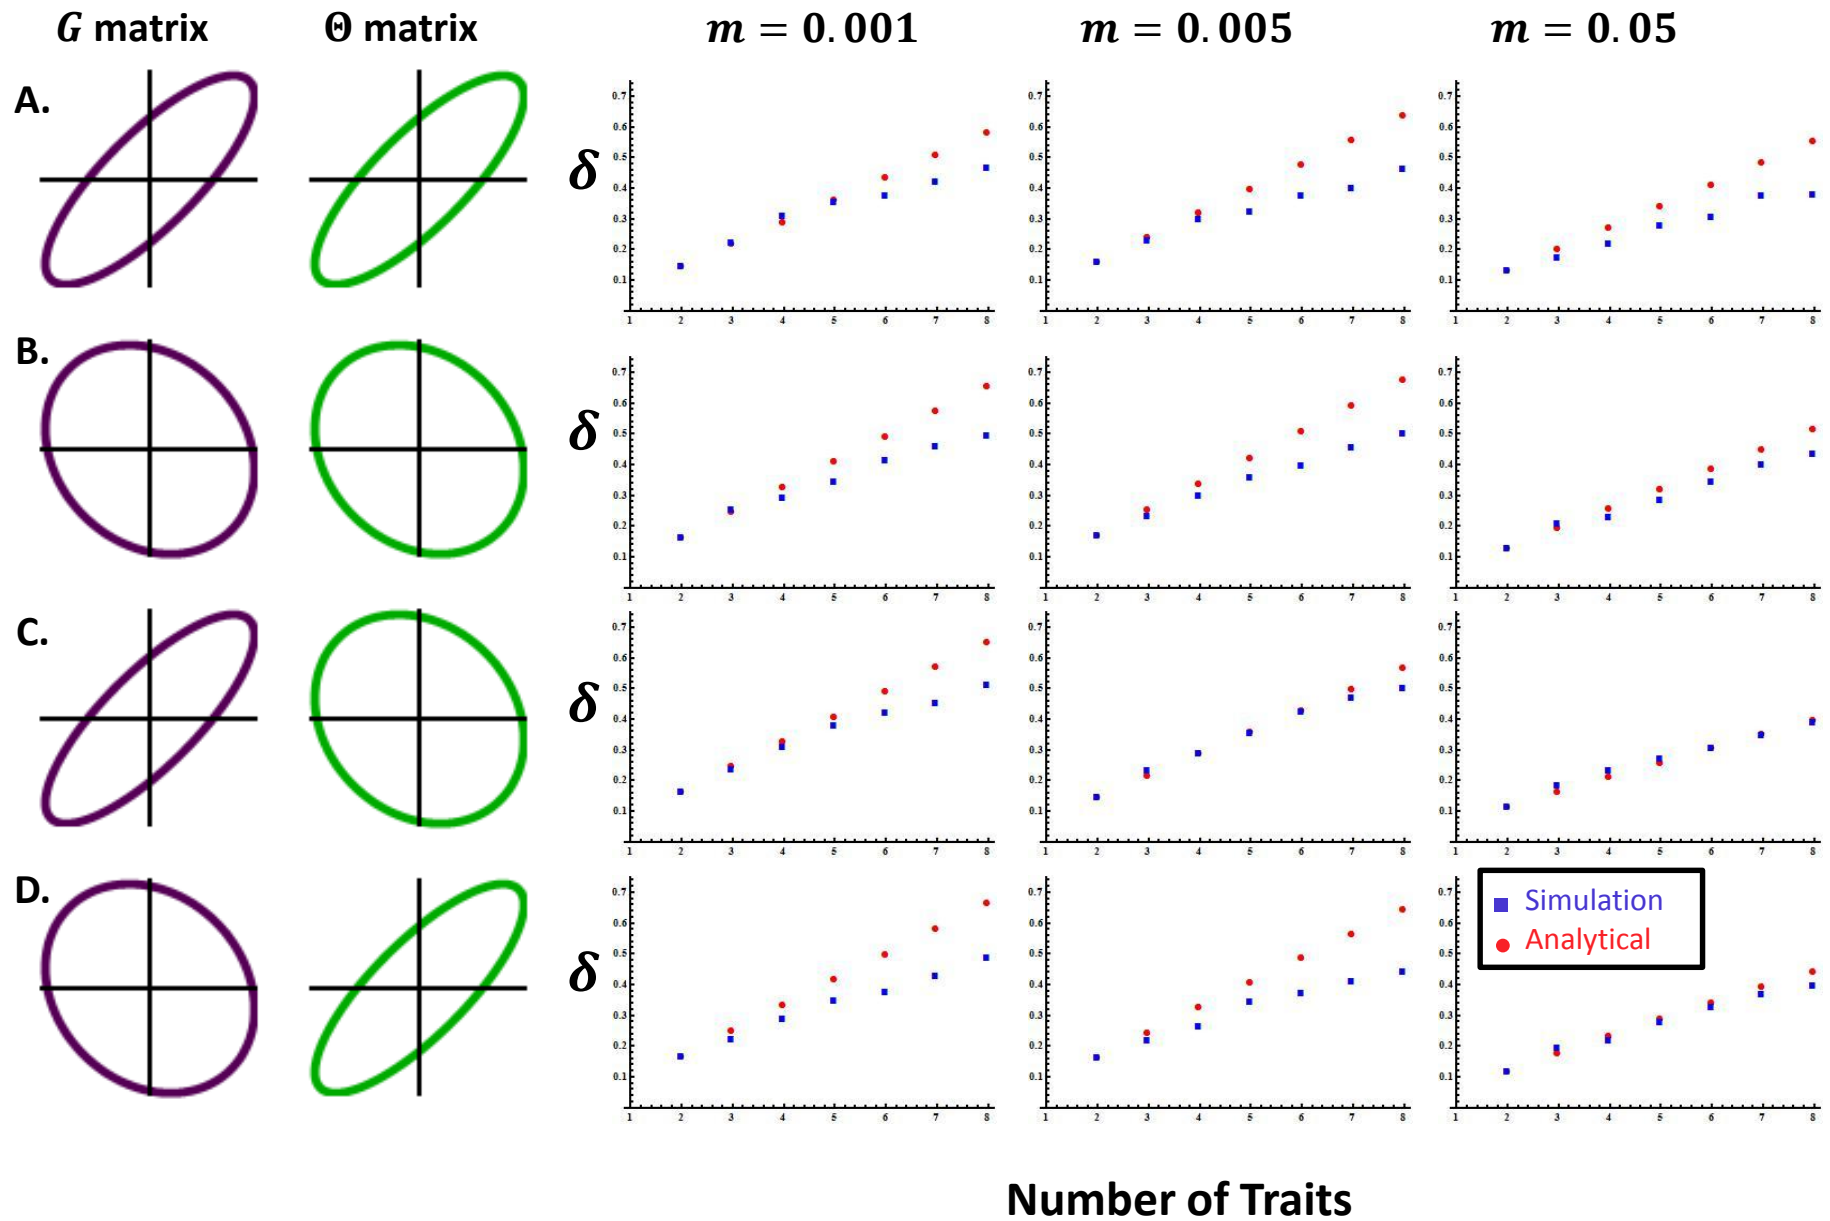



Figure S9- MacPherson et al.

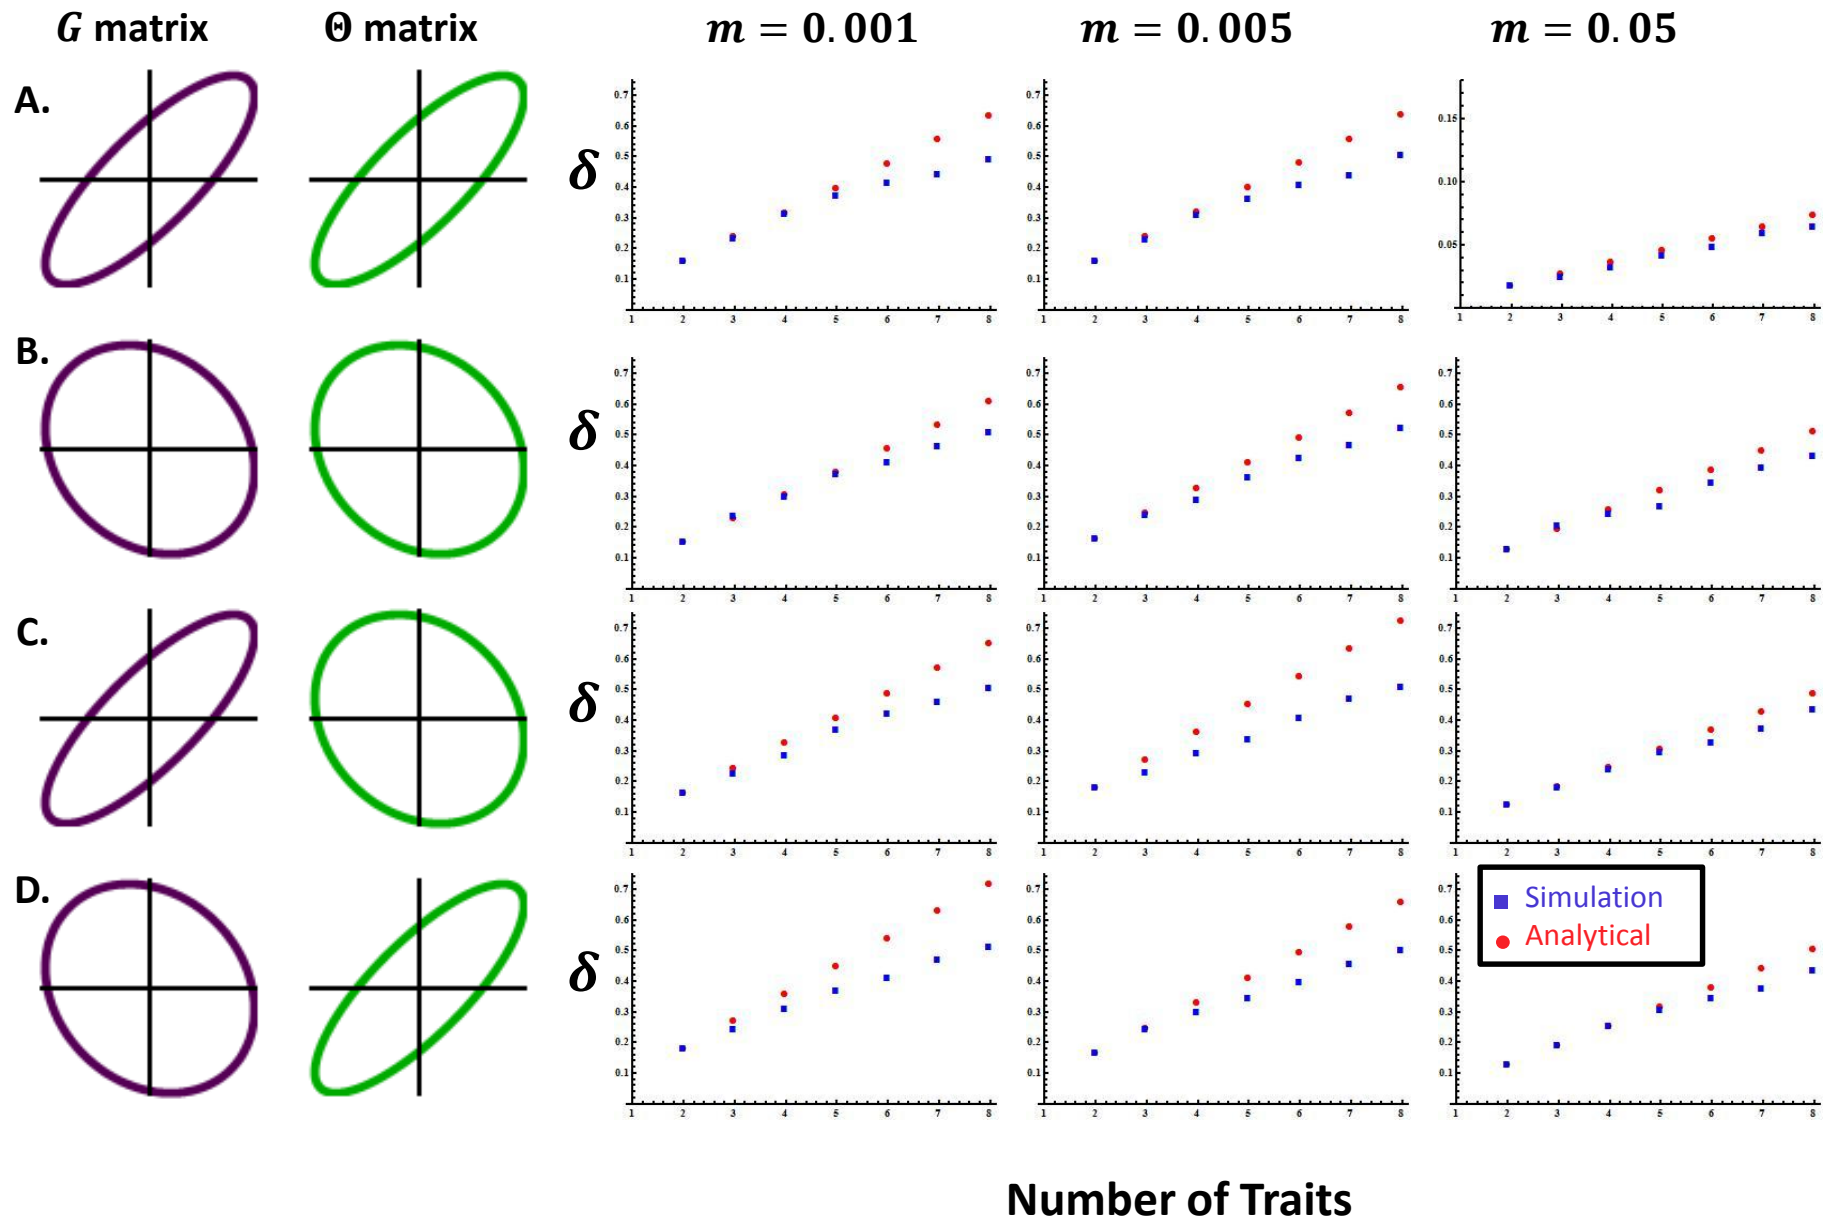

Supplement: rspb20141570supp2.pdf [file rspb20141570supp2.pdf]
